# Supplementary material for: The origin of high Na+ ion conductivity in Na1+xZr2SixP3−xO12 NASICON materials
Source: Royal Society of Chemistry journal article supplement (doi:10.1039/d2cp03621e), 2022-01-01
Supplement: d2cp03621e1.pdf [file d2cp03621e1.pdf]

## Supporting Information

### The Origin of High Na<sup>+</sup> Ion Conductivity in Na<sub>1+x</sub>Zr<sub>2</sub>Si<sub>x</sub>P<sub>3-x</sub>O<sub>12</sub> NASICON Materials

Judith Schütt,<sup>a,b</sup> Fiona Pescher,<sup>b</sup> Steffen Neitzel-Grieshammer<sup>b,c</sup>

<sup>a</sup>. Helmholtz-Institut Münster (IEK-12), Forschungszentrum Jülich GmbH, Corrensstraße 46, 48149 Münster, Germany.

<sup>b</sup>. Institute of Physical Chemistry, RWTH Aachen University, Landoltweg 2, 52056 Aachen, Germany.

<sup>c</sup>. JARA-HPC, RWTH Aachen University and Forschungszentrum Jülich GmbH, 52056 Aachen, Germany.

**Table S1.** Averaged bond distances  $\bar{d}$  of Na1-O, Na2-O, Na3-O, P-O, Si-O, Zr-O in monoclinic NASICON structure of composition Na<sub>1+x</sub>Zr<sub>2</sub>Si<sub>x</sub>P<sub>3-x</sub>O<sub>12</sub> ( $x = 0 - 3$ ).

|                                   | x = 0       | x = 1       | x = 2       | x = 3       |
|-----------------------------------|-------------|-------------|-------------|-------------|
| $\bar{d}(\text{Na1-O})[\text{Å}]$ | 2.54 ± 0.06 | 2.56 ± 0.17 | 2.54 ± 0.16 | 2.49 ± 0.05 |
| $\bar{d}(\text{Na2-O})[\text{Å}]$ | 2.46 ± 0.13 | 2.51 ± 0.13 | 2.55 ± 0.17 | 2.60 ± 0.18 |
| $\bar{d}(\text{Na3-O})[\text{Å}]$ | 2.48 ± 0.16 | 2.51 ± 0.14 | 2.53 ± 0.10 | 2.56 ± 0.11 |
| $\bar{d}(\text{P-O}) [\text{Å}]$  | 1.54 ± 0.04 | 1.54 ± 0.01 | 1.55 ± 0.01 |             |
| $\bar{d}(\text{Si-O}) [\text{Å}]$ |             | 1.63 ± 0.01 | 1.63 ± 0.01 | 1.64 ± 0.00 |
| $\bar{d}(\text{Zr-O}) [\text{Å}]$ | 2.07 ± 0.03 | 2.08 ± 0.07 | 2.09 ± 0.07 | 2.08 ± 0.05 |

**Table S2.** Bond distances  $\bar{d}$  of Na1-O, Na2-O, Na3-O, P-O, Si-O, Zr-O in monoclinic NASICON structure of composition Na<sub>3</sub>Zr<sub>2</sub>Si<sub>2</sub>PO<sub>12</sub> ( $x = 1$ ) determined experimentally<sup>1,2</sup> and by means of DFT<sup>3</sup> at RT.

|                                   | x = 2 <sup>1</sup> | x = 2 <sup>2</sup> | x = 2 <sup>3</sup> |
|-----------------------------------|--------------------|--------------------|--------------------|
| $\bar{d}(\text{Na1-O})[\text{Å}]$ | 2.61               | 2.70               | 2.53               |
| $\bar{d}(\text{Na2-O})[\text{Å}]$ | 2.70               | 2.59               | 2.58               |
| $\bar{d}(\text{Na3-O})[\text{Å}]$ | 2.72               | 2.55               | 2.53               |
| $\bar{d}(\text{P-O}) [\text{Å}]$  | 1.54               | 1.59               | 1.55               |
| $\bar{d}(\text{Si-O}) [\text{Å}]$ | 1.55               | 1.59               | 1.64               |
| $\bar{d}(\text{Zr-O}) [\text{Å}]$ | 2.10               | 2.08               | 2.10               |

**Table S3.** Averaged bond distances  $\bar{d}$  of Na1-O, Na2-O, Na3-O, P-O, Si-O, Zr-O in rhombohedral NASICON structure of composition  $\text{Na}_{1+x}\text{Zr}_2\text{Si}_x\text{P}_{3-x}\text{O}_{12}$  ( $x = 0 - 3$ ).

|                                   | x = 0           | x = 1           | x = 2           | x = 3           |
|-----------------------------------|-----------------|-----------------|-----------------|-----------------|
| $\bar{d}(\text{Na1-O})[\text{Å}]$ | $2.54 \pm 0.07$ | $2.54 \pm 0.17$ | $2.54 \pm 0.14$ | 2.44            |
| $\bar{d}(\text{Na2-O})[\text{Å}]$ | $2.45 \pm 0.12$ | $2.49 \pm 0.17$ | $2.54 \pm 0.16$ | $2.57 \pm 0.03$ |
| $\bar{d}(\text{P-O}) [\text{Å}]$  | $1.54 \pm 0.05$ | $1.54 \pm 0.02$ | $1.54 \pm 0.01$ |                 |
| $\bar{d}(\text{Si-O}) [\text{Å}]$ |                 | $1.63 \pm 0.01$ | $1.64 \pm 0.01$ | 1.64            |
| $\bar{d}(\text{Zr-O}) [\text{Å}]$ | $2.08 \pm 0.03$ | $2.08 \pm 0.08$ | $2.09 \pm 0.07$ | $2.08 \pm 0.05$ |

**Table S4.** Bond distances  $\bar{d}$  of Na1-O, Na2-O, Na3-O, P-O, Si-O, Zr-O in monoclinic NASICON structure of composition  $\text{Na}_3\text{Zr}_2\text{Si}_2\text{PO}_{12}$  ( $x = 1$ ) determined experimentally at RT.<sup>2</sup>

|                                   | x = 1 |
|-----------------------------------|-------|
| $\bar{d}(\text{Na1-O})[\text{Å}]$ | 2.62  |
| $\bar{d}(\text{Na2-O})[\text{Å}]$ | 2.67  |
| $\bar{d}(\text{P-O}) [\text{Å}]$  | 1.55  |
| $\bar{d}(\text{Si-O}) [\text{Å}]$ | 1.55  |
| $\bar{d}(\text{Zr-O}) [\text{Å}]$ | 2.07  |

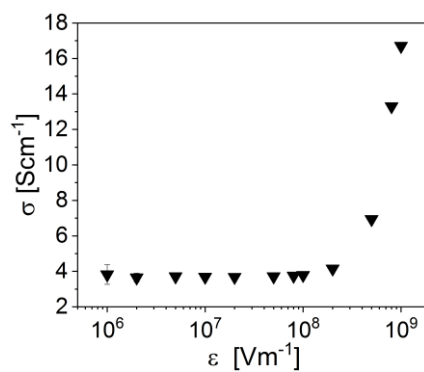

**Figure S1.** Conductivity  $\sigma$  in dependence of electric field strength  $\epsilon$  in x-direction. In this study  $\epsilon = 10^7 \text{ Vm}^{-1}$  was applied.

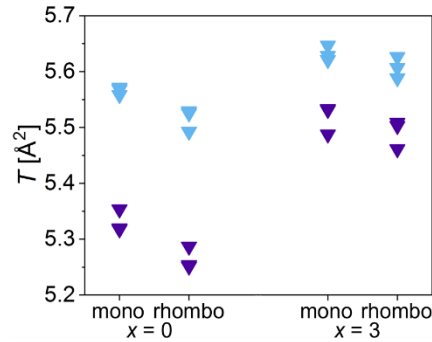

**Figure S2.** Area T of bottlenecks for sodium ion migration in initial/final state (purple) and transition state (blue) of rhombohedral and monoclinic structure with composition  $x = 0$  and  $x = 3$

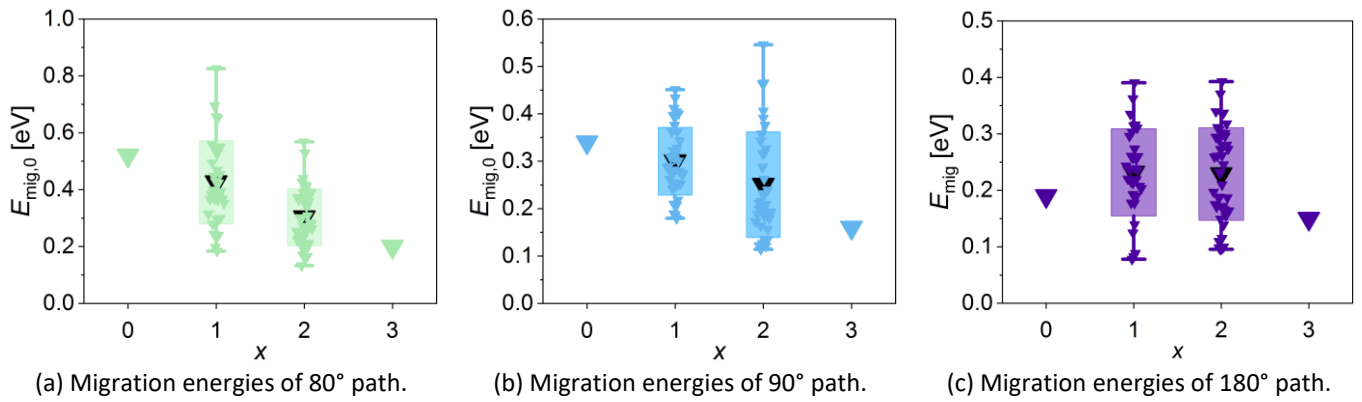

**Figure S3.** Migration energies  $E_{\text{mig},0}$  in dependence of doping fraction  $x$  for 80° (a), 90° (b) and 180° (c) pathways in rhombohedral structure. All calculated migration energies (triangle), averaged migration energies (black triangles), standard deviations (box) and range between minimum and maximum values are shown.

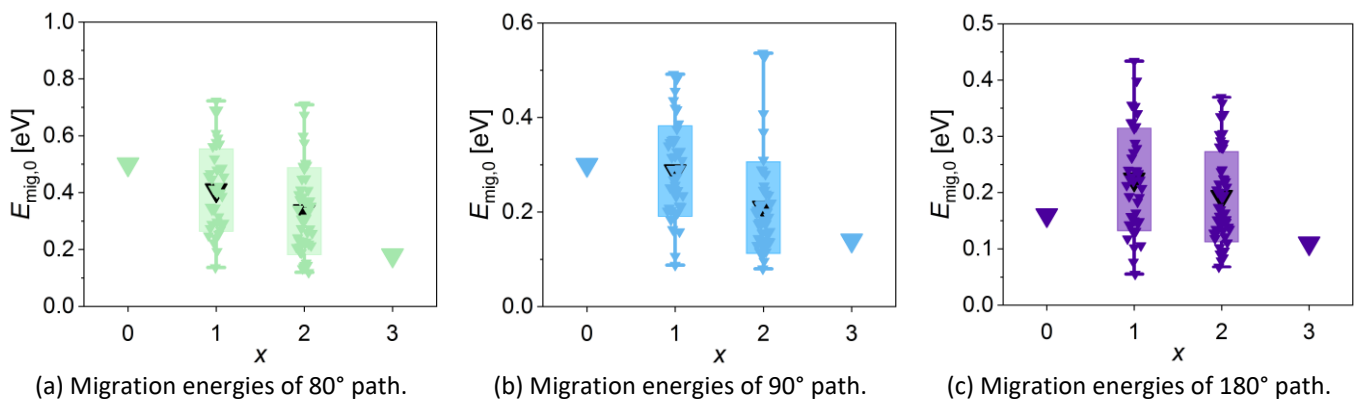

**Figure S4.** Migration energies  $E_{\text{mig},0}$  in dependence of doping fraction  $x$  for 80° (a), 90° (b) and 180° (c) pathways in monoclinic structure. All calculated migration energies (triangle), averaged migration energies (black triangles), standard deviations (box) and range between minimum and maximum values are shown.

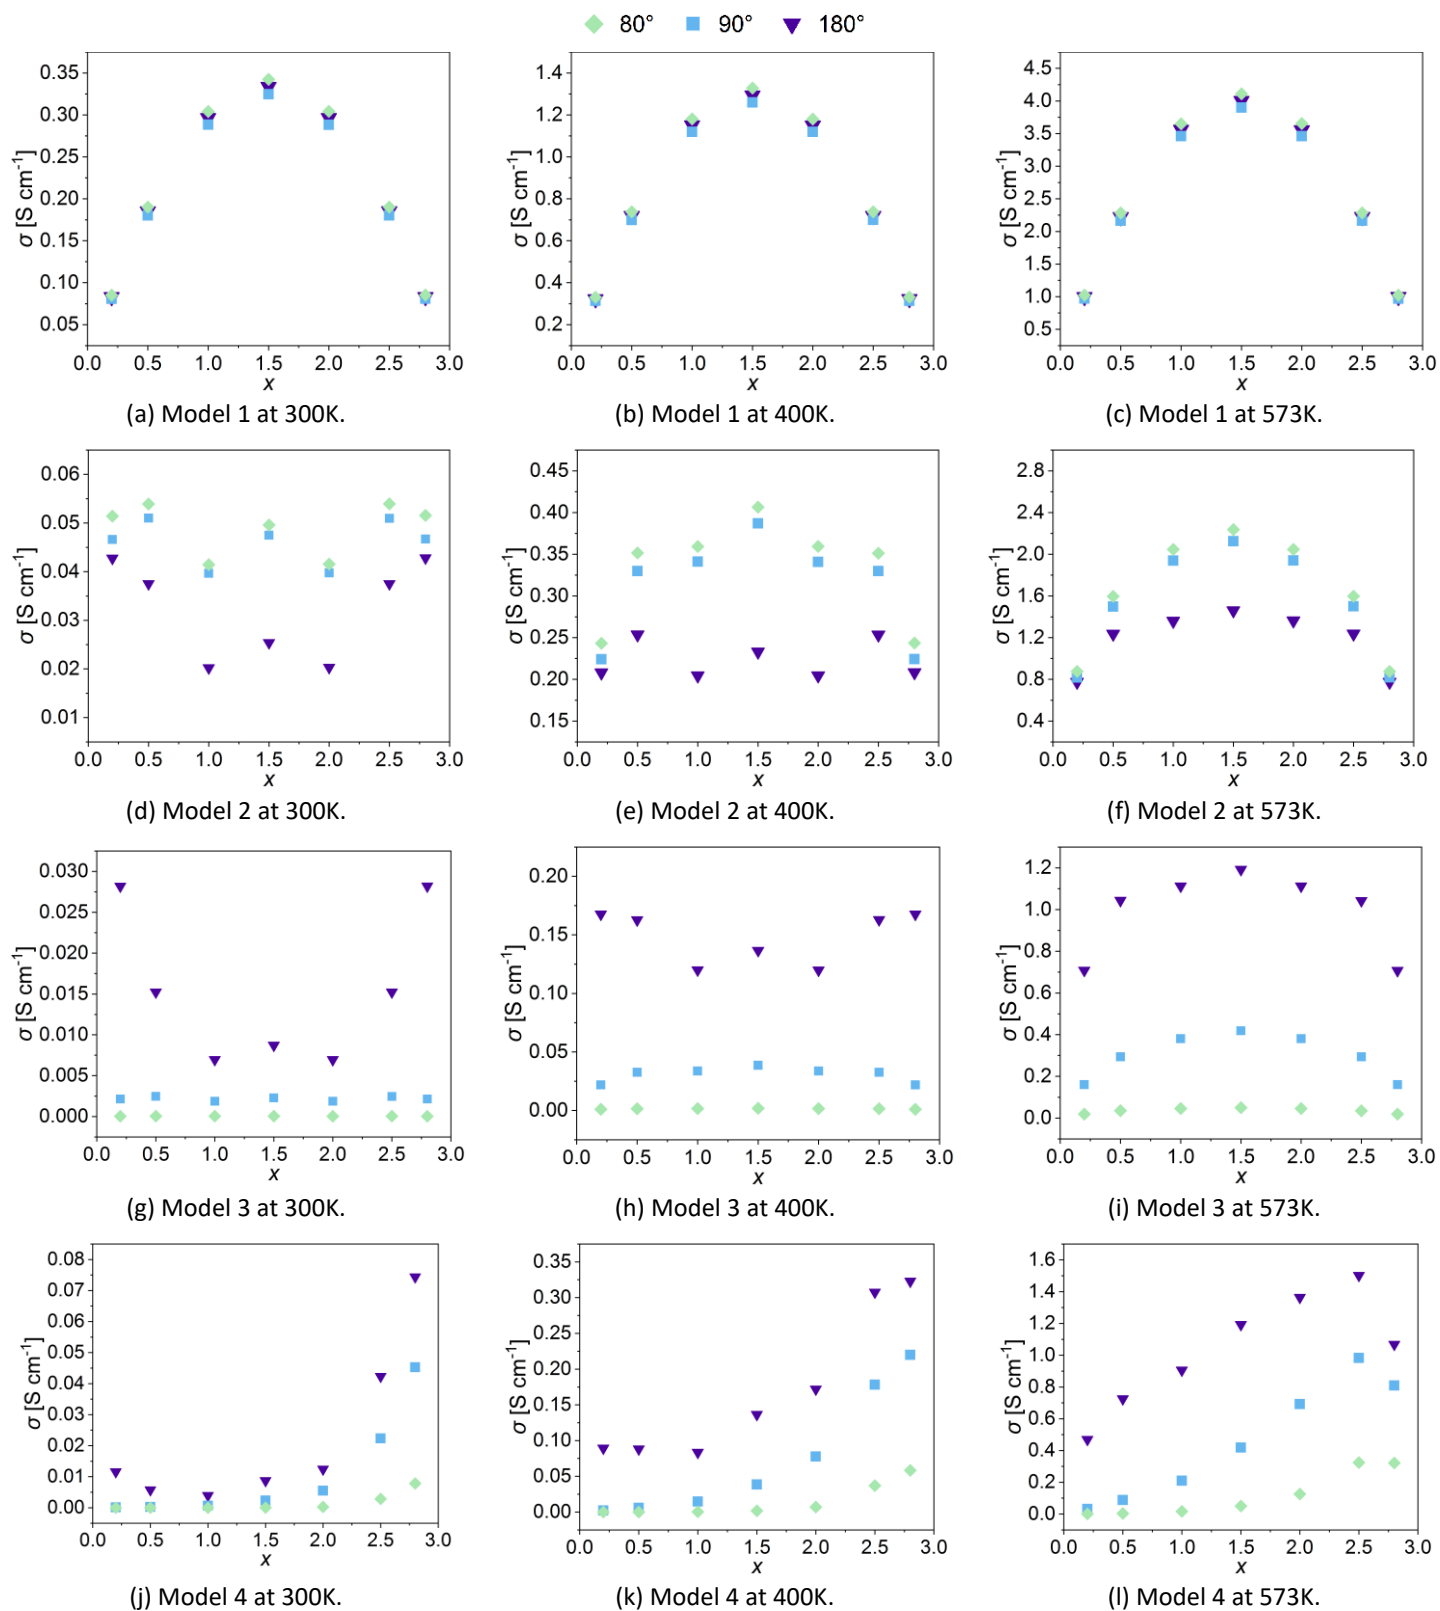

**Figure S5.** Partial conductivity resulting from 80° (green), 90° (blue) and 180° (purple) migration in rhombohedral  $\text{Na}_{1+x}\text{Zr}_2\text{Si}_x\text{P}_{3-x}\text{O}_{12}$  ( $x = 0.2 - 2.8$ ) at  $T = 300\text{K}, 400\text{K}, 573\text{K}$  obtained from simulation using model 2 – 4.

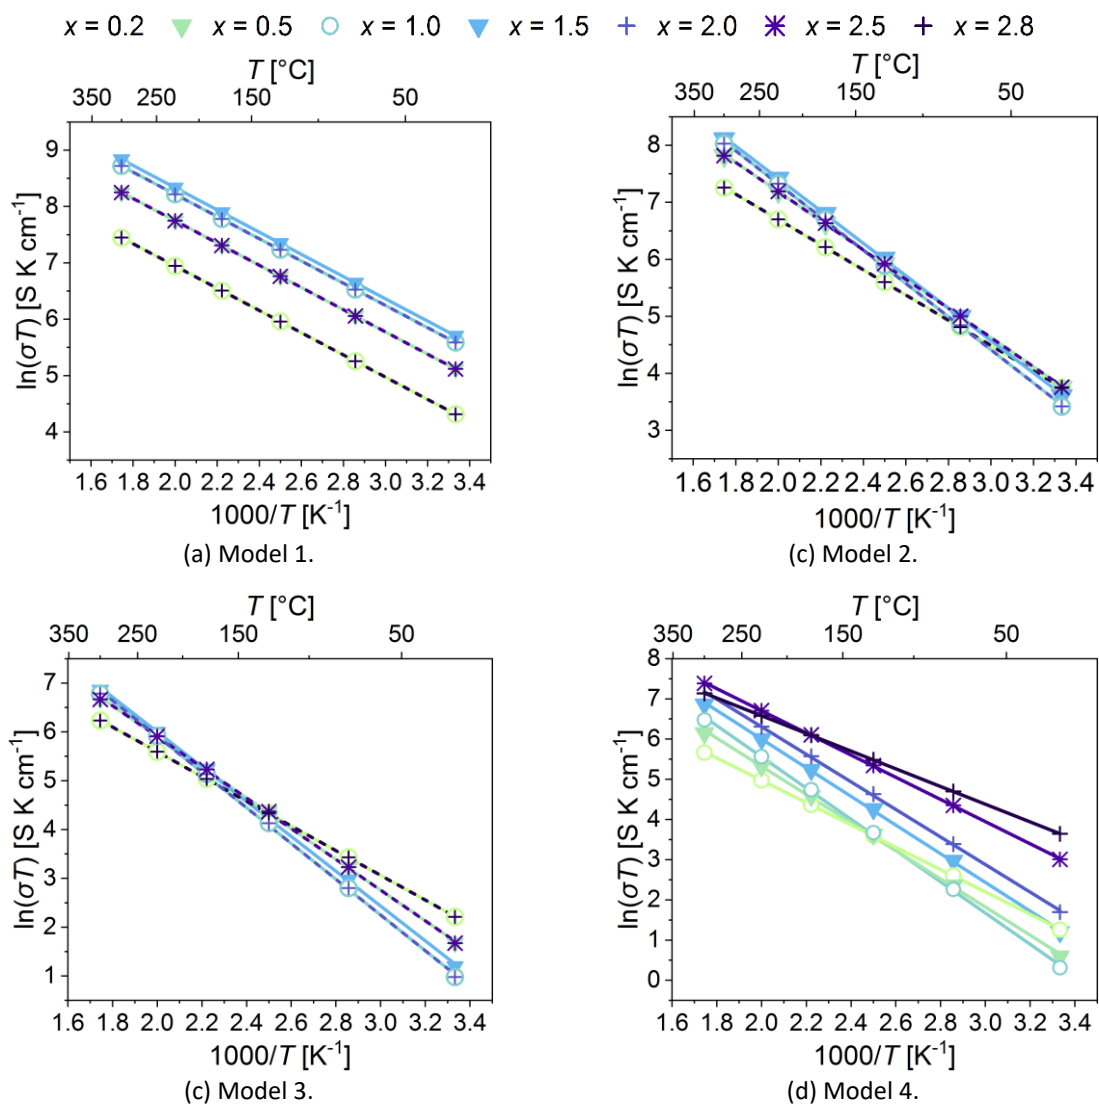

**Figure S6.** Arrhenius plots obtained from conductivities of simulations using model 1 – 4 of rhombohedral  $\text{Na}_{1+x}\text{Zr}_2\text{Si}_x\text{P}_{3-x}\text{O}_{12}$  ( $x = 0.2 - 2.8$ ) in the temperature range of  $T = 350 - 573$  K in  $10 \times 10 \times 10$  cell.

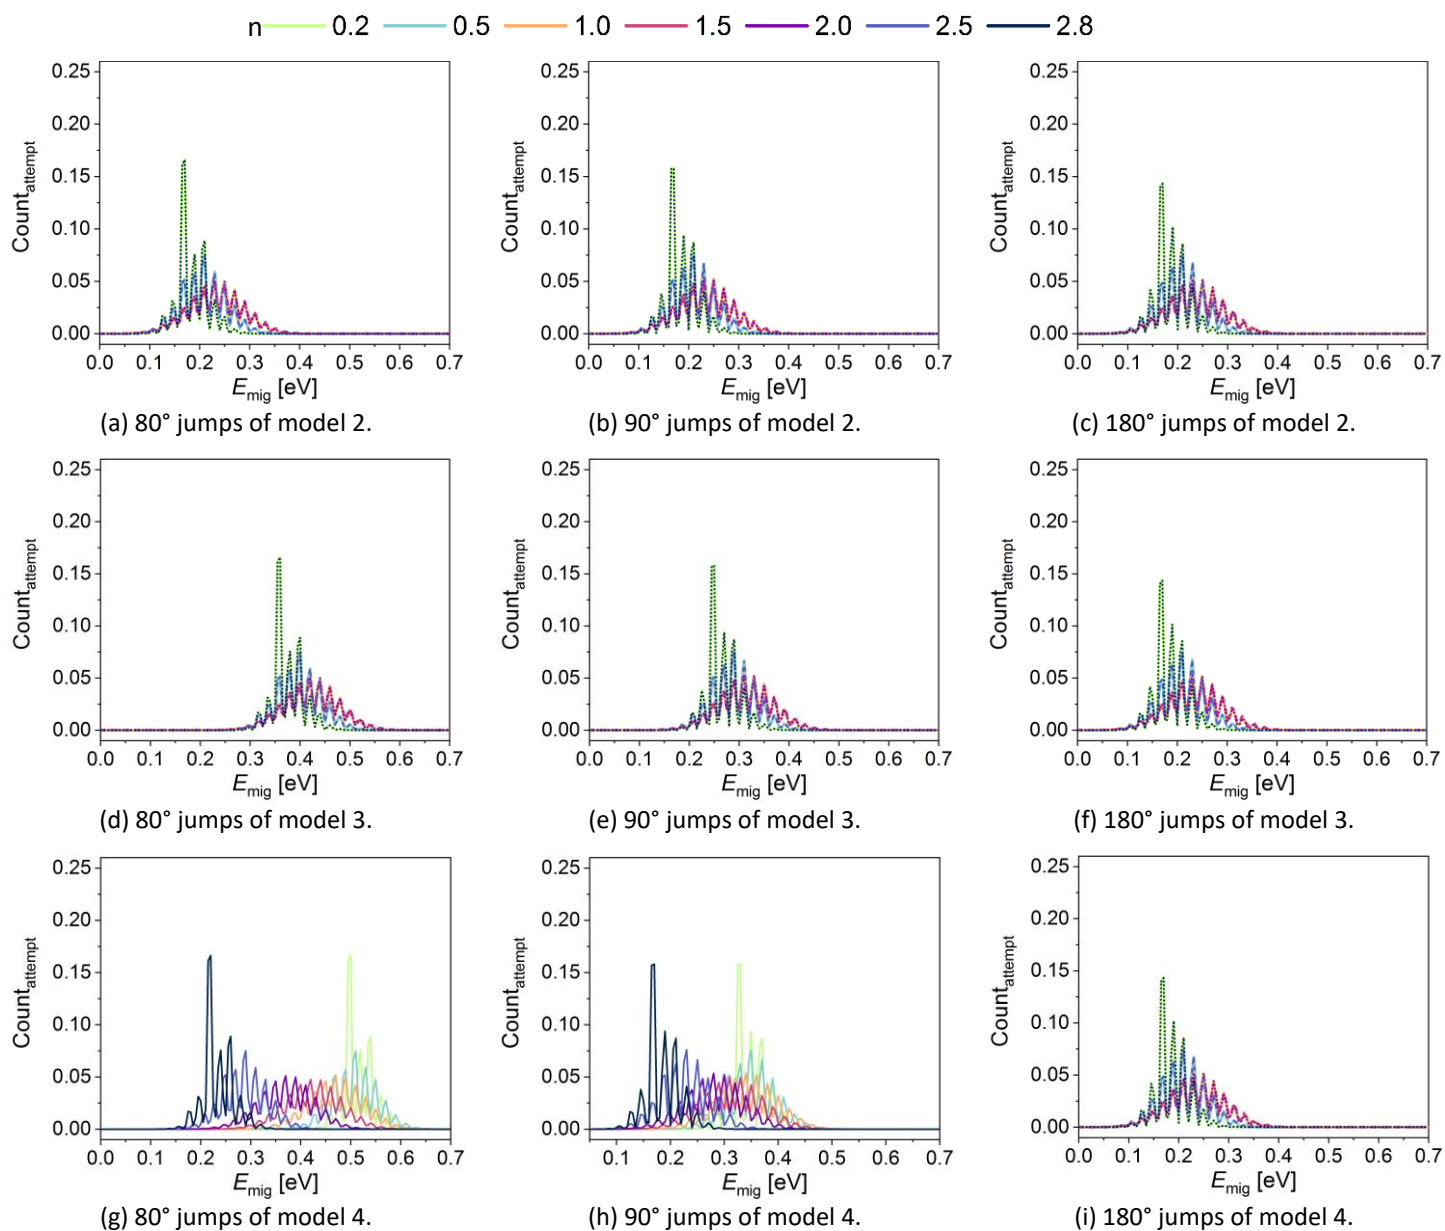

**Figure S7.** Normalized energy-dependent number of attempted jumps in 80°, 90° and 180° direction in  $\text{Na}_{1+x}\text{Zr}_2\text{Si}_x\text{P}_{3-x}\text{O}_{12}$  ( $x = 0.2 - 2.8$ ) at  $T = 573$  K of simulation using model 2 - 4.

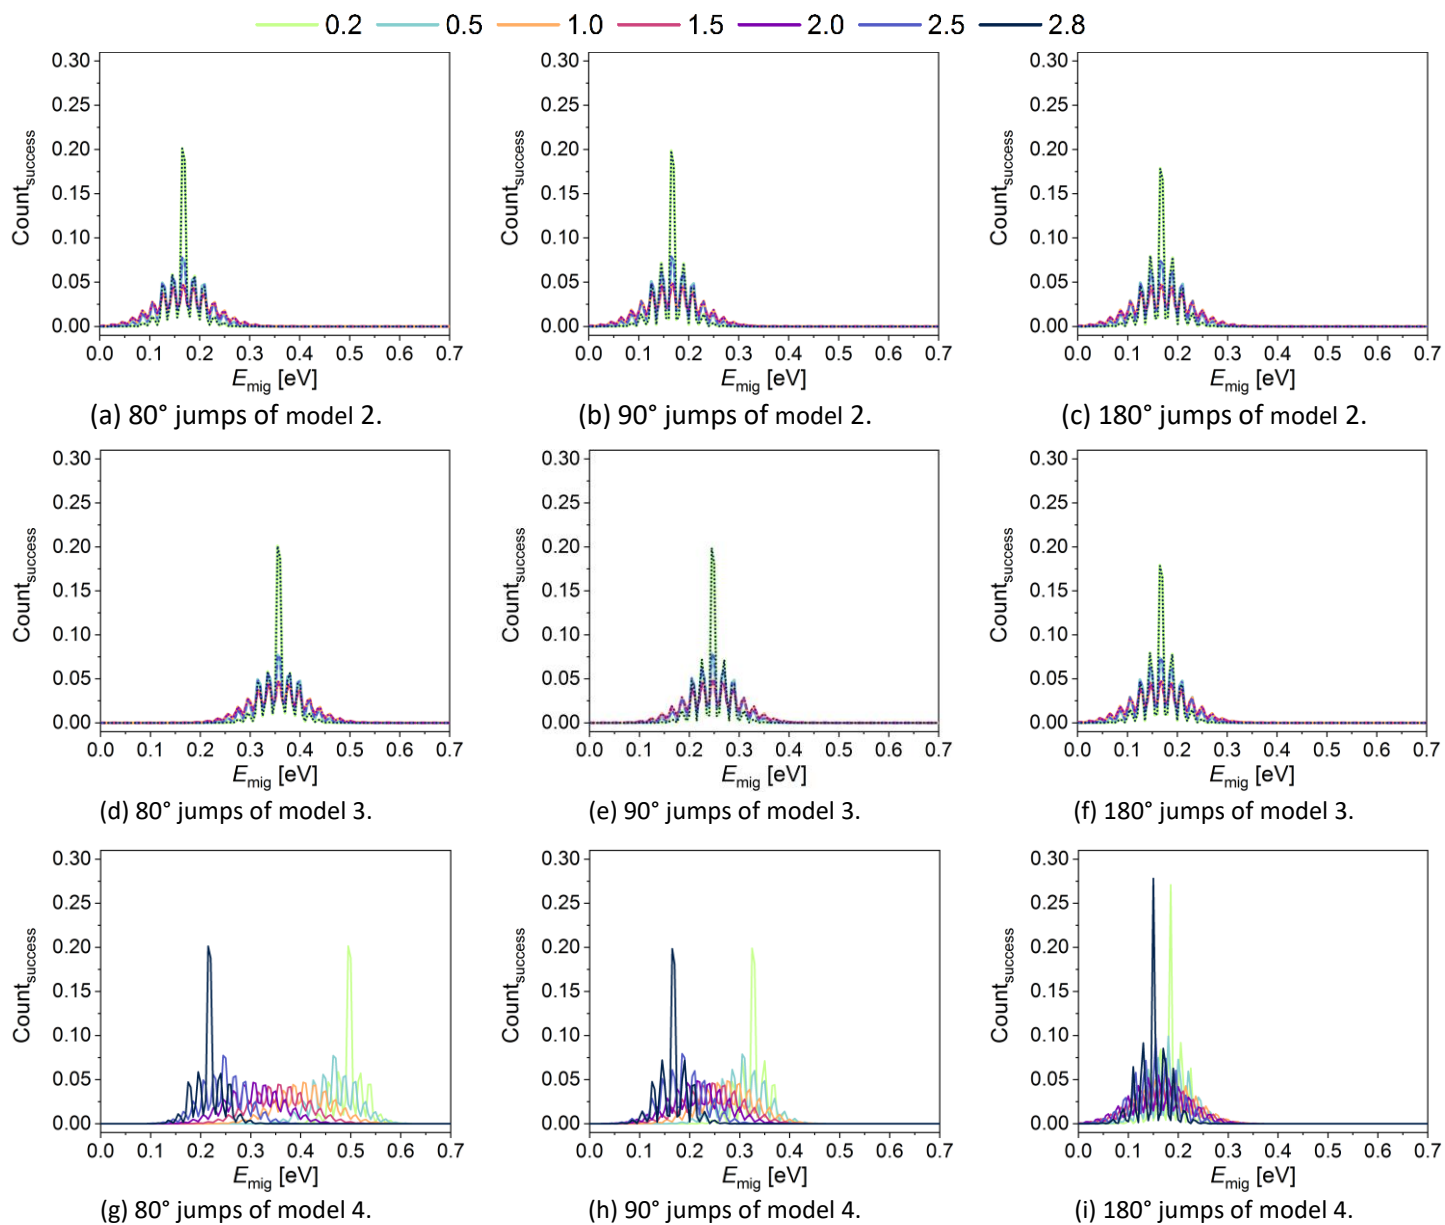

**Figure S8.** Normalized energy-dependent number of succeeded jumps in 80°, 90° and 180° direction in  $\text{Na}_{1+x}\text{Zr}_2\text{Si}_x\text{P}_{3-x}\text{O}_{12}$  ( $x = 0.2 - 2.8$ ) at  $T = 573$  K of simulation using model 2 – 4.

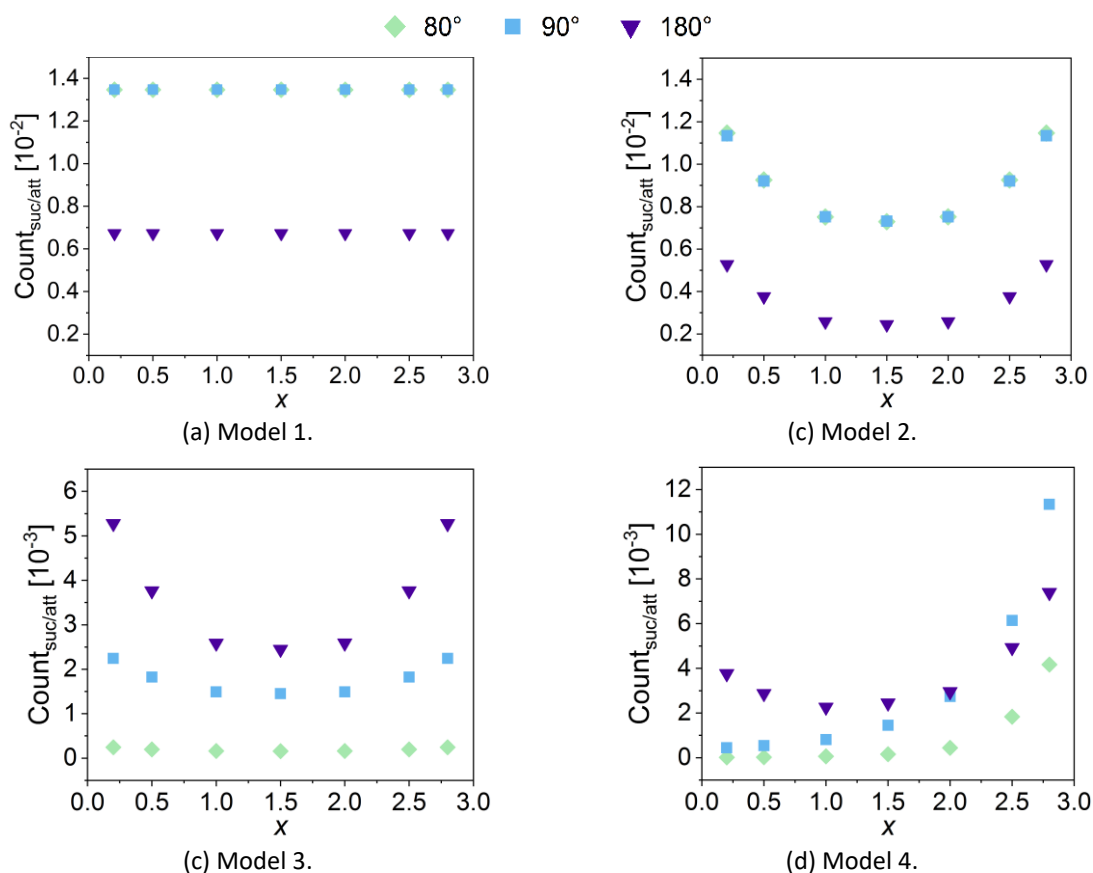

**Figure S9.** Ratio of succeeded to attempted jumps in 80° (green), 90° (blue) and 180° (purple) direction in  $\text{Na}_{1+x}\text{Zr}_2\text{Si}_x\text{P}_{3-x}\text{O}_{12}$  ( $x = 0.2 - 2.8$ ) at  $T = 573$  K of simulation using model 2 – 4.

## References

- 1 H.-P. Hong, Crystal structures and crystal chemistry in the system  $\text{Na}_{1+x}\text{Zr}_2\text{Si}_x\text{P}_{3-x}\text{O}_{12}$ , *Mater. Res. Bull.*, 1976, **11**, 173–182.
- 2 W. H. Baur, Dygas, JR, D. H. Whitmore and J. Faber, Neutron powder diffraction study and ionic conductivity of  $\text{Na}_2\text{Zr}_2\text{SiP}_2\text{O}_{12}$  and  $\text{Na}_3\text{Zr}_2\text{Si}_2\text{PO}_{12}$ , *Solid State Ion.*, 1986, **18**, 935–943.
- 3 K. M. Bui, A. van Dinh, S. Okada and T. Ohno, Na-ion diffusion in a NASICON-type solid electrolyte: a density functional study, *Phys. Chem. Chem. Phys.*, 2016, **18**, 27226–27231.
